# Supplementary material for: Electrochemical Sensor Based on Iron(II) Phthalocyanine and Gold Nanoparticles for Nitrite Detection in Meat Products
Source: MDPI journal article supplement (doi:10.3390/s22155780), 2022-08-02
Supplement: s1 [file s1]

# Electrochemical Sensor Based on iron(II) Phthalocyanine and Gold Nanoparticles for Nitrite Detection in Meat Products

Svetlana I. Dorovskikh<sup>1</sup>, Darya D. Klyamer<sup>1</sup>, Anastasiya D. Fedorenko<sup>1</sup>, Natalia B. Morozova<sup>1</sup>, Tamara V. Basova<sup>1\*</sup>

<sup>1</sup> Nikolaev Institute of Inorganic Chemistry SB RAS, 3 Lavrentiev Pr., Novosibirsk, 630090, Russia

<sup>2</sup> Novosibirsk State University, Novosibirsk 630090, Russia

\*Correspondence: basova@niic.nsc.ru; Tel.: +73833309556

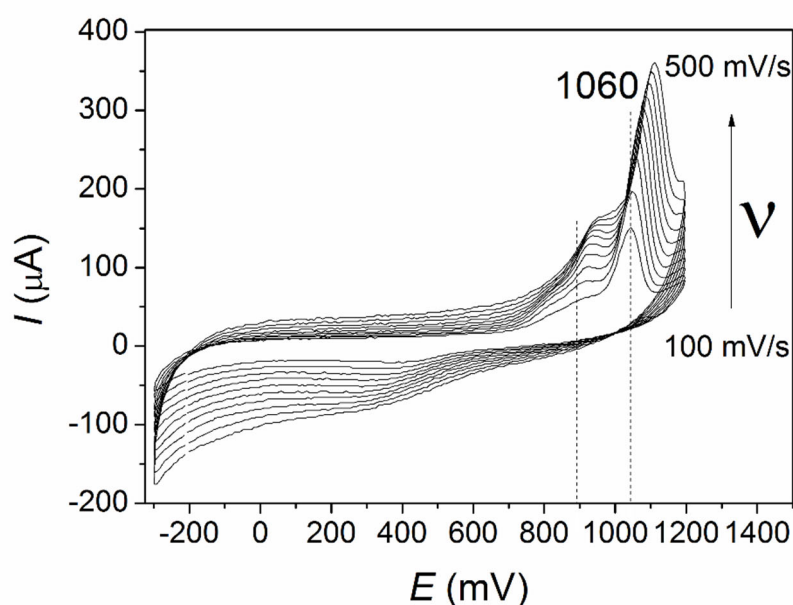

**Figure S1.** CV curves of Au/FePc(tBu)<sub>4</sub>/GCE, recorded at (-300–1200 mV).

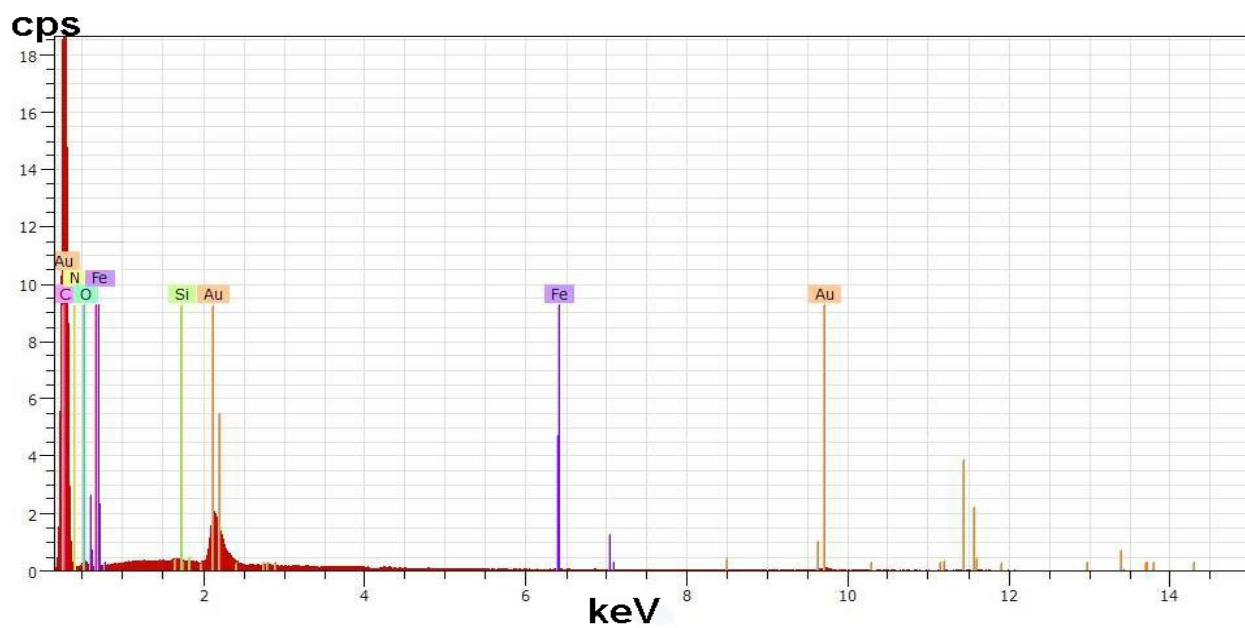

**Figure S2.** EDX spectrum of Au/FePc(tBu)<sub>4</sub>/GCE.

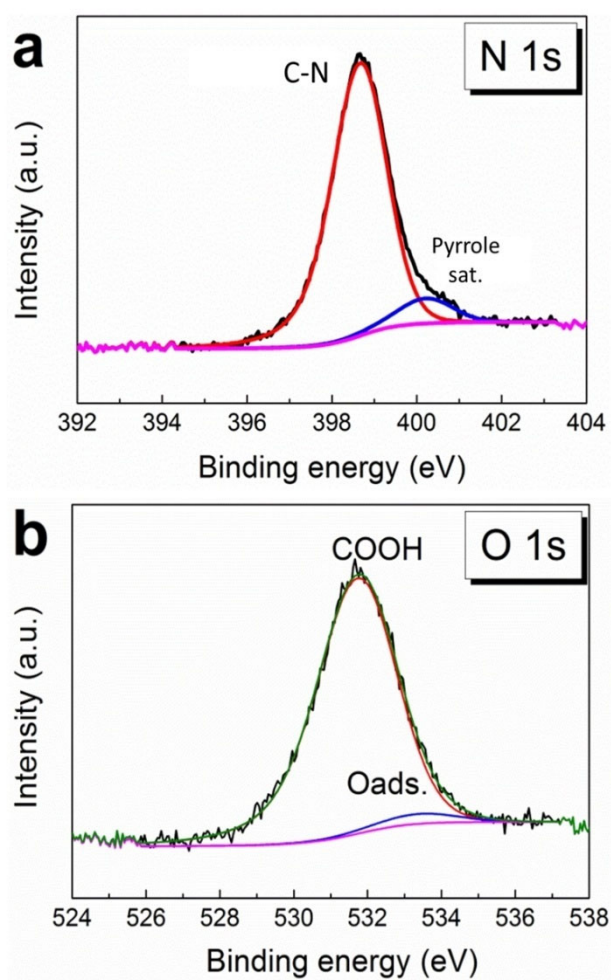

**Figure S3.** N1s spectra of FePc(tBu)<sub>4</sub>/GCE (a) and O1s spectra of FePc(tBu)<sub>4</sub>/GCE (b).

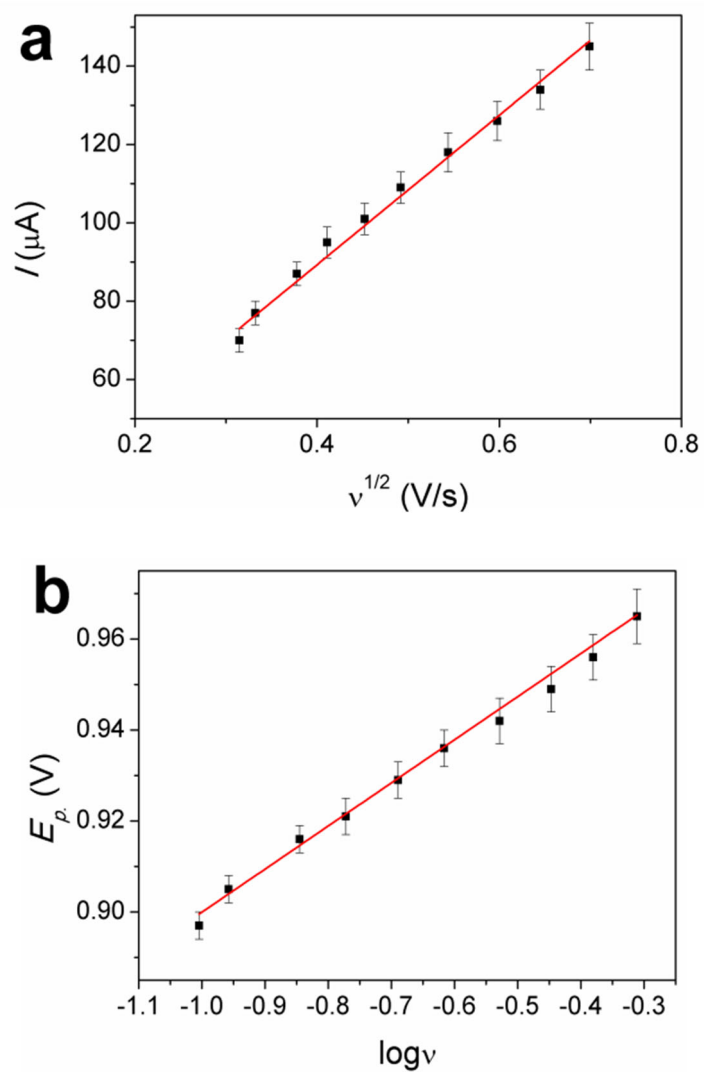

**Figure S4.**  $I$ - $v^{1/2}$  (a) and  $E$ - $\log v$  (b) dependences for Au/FePc(tBu)<sub>4</sub>/GCE, recorded in the presence of 0.25 mM nitrite at (-300–1200 mV).
